# Supplementary material for: Maternal and Cord Blood Serum Metabolite Associations with Childhood Adiposity and Body Composition Outcomes
Source: MDPI journal article supplement (doi:10.3390/metabo13060749), 2023-06-13
Supplement: s1 [file s1]

**Supplementary Materials:**

| <b>Supplemental Table S1. Association of cord blood metabolites to child adiposity (using fully adjusted model)</b> |                                          |                                                             |                                                 |                                            |
|---------------------------------------------------------------------------------------------------------------------|------------------------------------------|-------------------------------------------------------------|-------------------------------------------------|--------------------------------------------|
| Cord Blood Metabolite                                                                                               | Child BMI-z score<br>Beta, (CI), p-value | Child Waist Circumference (iliac cm)<br>Beta, (CI), p-value | Child Fat Free mass (kg)<br>Beta, (CI), p-value | Child Fat Mass (kg)<br>Beta, (CI), p-value |
| Alanine                                                                                                             | -0.04, (-0.12 - 0.04), 0.333             | -0.48, (-1.25 - 0.3), 0.227                                 | -0.34, (-0.72 - 0.04), 0.078                    | -0.12, (-0.64 - 0.4), 0.644                |
| Arginine                                                                                                            | -0.03, (-0.11 - 0.05), 0.516             | -0.13, (-0.91 - 0.65), 0.744                                | -0.23, (-0.61 - 0.15), 0.227                    | -0.04, (-0.56 - 0.48), 0.877               |
| Asparagine/Aspartic acid                                                                                            | -0.06, (-0.13 - 0.02), 0.151             | -0.39, (-1.13 - 0.34), 0.296                                | -0.2, (-0.56 - 0.15), 0.265                     | -0.34, (-0.84 - 0.15), 0.173               |
| Citrulline                                                                                                          | -0.02, (-0.1 - 0.06), 0.58               | 0.01, (-0.75 - 0.77), 0.978                                 | -0.11, (-0.48 - 0.26), 0.547                    | -0.05, (-0.56 - 0.46), 0.855               |
| Glutamine/Glutamic acid                                                                                             | 0, (-0.09 - 0.08), 0.981                 | 0.02, (-0.81 - 0.86), 0.957                                 | 0.01, (-0.39 - 0.42), 0.953                     | 0, (-0.56 - 0.55), 0.992                   |
| Glycine                                                                                                             | 0, (-0.08 - 0.08), 0.989                 | 0.06, (-0.68 - 0.8), 0.874                                  | -0.15, (-0.52 - 0.21), 0.404                    | 0.14, (-0.36 - 0.64), 0.595                |
| Glycerol                                                                                                            | -0.02, (-0.1 - 0.05), 0.559              | -0.23, (-0.99 - 0.53), 0.559                                | -0.18, (-0.55 - 0.19), 0.339                    | -0.27, (-0.78 - 0.24), 0.297               |
| Histidine                                                                                                           | 0.05, (-0.03 - 0.13), 0.218              | 0.16, (-0.6 - 0.92), 0.681                                  | -0.19, (-0.56 - 0.18), 0.308                    | 0.18, (-0.33 - 0.69), 0.486                |
| Lactate                                                                                                             | -0.04, (-0.12 - 0.03), 0.258             | -0.41, (-1.14 - 0.32), 0.271                                | -0.2, (-0.56 - 0.16), 0.277                     | -0.16, (-0.65 - 0.33), 0.517               |
| Leucine/Isoleucine                                                                                                  | 0.01, (-0.07 - 0.09), 0.797              | -0.16, (-0.94 - 0.61), 0.681                                | -0.13, (-0.51 - 0.25), 0.508                    | -0.04, (-0.56 - 0.48), 0.873               |
| AC C2                                                                                                               | 0.01, (-0.07 - 0.1), 0.717               | -0.15, (-0.94 - 0.64), 0.71                                 | 0.06, (-0.33 - 0.44), 0.765                     | -0.17, (-0.7 - 0.36), 0.535                |
| AC C3                                                                                                               | -0.04, (-0.12 - 0.04), 0.28              | -0.5, (-1.26 - 0.26), 0.2                                   | -0.21, (-0.58 - 0.16), 0.266                    | -0.44, (-0.96 - 0.07), 0.089               |
| AC C4/Ci4                                                                                                           | -0.07, (-0.15 - 0.01), 0.106             | -0.6, (-1.37 - 0.18), 0.134                                 | -0.29, (-0.67 - 0.09), 0.136                    | -0.43, (-0.95 - 0.09), 0.108               |
| AC C5:1                                                                                                             | 0, (-0.07 - 0.08), 0.912                 | -0.08, (-0.81 - 0.66), 0.839                                | 0.04, (-0.32 - 0.4), 0.838                      | 0.02, (-0.47 - 0.52), 0.922                |
| AC C5                                                                                                               | -0.02, (-0.09 - 0.06), 0.702             | -0.36, (-1.12 - 0.4), 0.355                                 | -0.13, (-0.5 - 0.24), 0.502                     | -0.32, (-0.83 - 0.19), 0.224               |
| AC C4-OH                                                                                                            | 0.01, (-0.07 - 0.09), 0.853              | 0.12, (-0.67 - 0.91), 0.77                                  | -0.03, (-0.41 - 0.36), 0.883                    | 0.13, (-0.4 - 0.66), 0.623                 |
| AC C6                                                                                                               | -0.08, (-0.27 - 0.11), 0.422             | -0.93, (-2.66 - 0.8), 0.295                                 | -0.58, (-1.45 - 0.28), 0.188                    | -0.46, (-1.61 - 0.69), 0.431               |
| AC C5-OH/C3-DC                                                                                                      | -0.11, (-0.24 - 0.02), 0.099             | -1.09, (-2.31 - 0.12), 0.079                                | -0.56, (-1.13 - 0.02), 0.058                    | -0.63, (-1.46 - 0.21), 0.145               |
| AC C4-DC/Ci4-DC                                                                                                     | -0.01, (-0.1 - 0.09), 0.915              | -0.15, (-1.09 - 0.78), 0.746                                | -0.1, (-0.54 - 0.34), 0.654                     | 0.06, (-0.57 - 0.69), 0.853                |
| AC C8:1                                                                                                             | 0.04, (-0.04 - 0.12), 0.362              | 0.24, (-0.58 - 1.06), 0.57                                  | 0.21, (-0.19 - 0.61), 0.301                     | 0.24, (-0.31 - 0.79), 0.399                |
| AC C8                                                                                                               | -0.01, (-0.08 - 0.07), 0.878             | -0.02, (-0.78 - 0.74), 0.958                                | -0.15, (-0.52 - 0.22), 0.44                     | 0.17, (-0.33 - 0.68), 0.503                |
| AC C5-DC                                                                                                            | -0.01, (-0.09 - 0.07), 0.868             | -0.12, (-0.91 - 0.66), 0.758                                | -0.11, (-0.49 - 0.27), 0.574                    | -0.11, (-0.64 - 0.42), 0.692               |
| AC C6-DC/C8-OH                                                                                                      | 0, (-0.08 - 0.07), 0.907                 | -0.05, (-0.79 - 0.7), 0.906                                 | 0.19, (-0.18 - 0.55), 0.312                     | -0.03, (-0.53 - 0.47), 0.913               |

|                      |                              |                              |                              |                              |
|----------------------|------------------------------|------------------------------|------------------------------|------------------------------|
| AC C10:3             | 0.02, (-0.06 - 0.1), 0.611   | 0.11, (-0.7 - 0.91), 0.792   | -0.03, (-0.42 - 0.37), 0.897 | 0.17, (-0.37 - 0.71), 0.54   |
| AC C10:2             | 0.01, (-0.07 - 0.09), 0.809  | -0.02, (-0.79 - 0.75), 0.954 | 0.06, (-0.31 - 0.44), 0.747  | 0.08, (-0.43 - 0.6), 0.751   |
| AC C10:1             | 0.01, (-0.07 - 0.09), 0.805  | 0.01, (-0.77 - 0.79), 0.982  | -0.15, (-0.53 - 0.23), 0.436 | 0.06, (-0.46 - 0.59), 0.813  |
| AC C10               | -0.06, (-0.22 - 0.09), 0.437 | -0.43, (-1.81 - 0.95), 0.541 | 0, (-0.67 - 0.67), 0.995     | -0.21, (-1.13 - 0.71), 0.655 |
| AC C10-OH/C8-DC      | -0.01, (-0.09 - 0.07), 0.82  | 0, (-0.78 - 0.79), 0.99      | 0.18, (-0.2 - 0.56), 0.358   | -0.04, (-0.57 - 0.49), 0.884 |
| AC C12:1             | 0.01, (-0.07 - 0.09), 0.884  | 0.03, (-0.76 - 0.82), 0.933  | -0.08, (-0.46 - 0.31), 0.7   | 0.34, (-0.19 - 0.87), 0.211  |
| AC C12               | -0.06, (-0.14 - 0.02), 0.124 | -0.58, (-1.35 - 0.2), 0.146  | -0.23, (-0.61 - 0.15), 0.232 | -0.17, (-0.69 - 0.36), 0.537 |
| AC C12-OH/C10-DC     | 0.02, (-0.06 - 0.09), 0.686  | 0.43, (-0.33 - 1.2), 0.269   | 0.32, (-0.05 - 0.7), 0.09    | 0.43, (-0.09 - 0.94), 0.104  |
| AC C14:2             | -0.03, (-0.11 - 0.05), 0.446 | -0.35, (-1.11 - 0.41), 0.37  | -0.27, (-0.65 - 0.1), 0.149  | 0.06, (-0.45 - 0.57), 0.817  |
| AC C14:1             | -0.01, (-0.09 - 0.07), 0.889 | -0.13, (-0.9 - 0.65), 0.744  | -0.11, (-0.49 - 0.27), 0.571 | 0.17, (-0.36 - 0.69), 0.532  |
| AC C14               | 0.02, (-0.06 - 0.09), 0.701  | 0, (-0.77 - 0.76), 0.99      | -0.04, (-0.41 - 0.34), 0.847 | 0.24, (-0.28 - 0.76), 0.366  |
| AC C14:1-OH          | 0.07, (-0.02 - 0.16), 0.132  | 0.54, (-0.31 - 1.39), 0.212  | 0.37, (-0.04 - 0.78), 0.074  | 0.49, (-0.07 - 1.06), 0.086  |
| AC C14-OH/C12-DC     | 0.03, (-0.06 - 0.12), 0.531  | 0.15, (-0.71 - 1), 0.738     | 0.21, (-0.19 - 0.62), 0.298  | 0.22, (-0.34 - 0.78), 0.445  |
| AC C16               | 0.01, (-0.07 - 0.09), 0.719  | -0.02, (-0.8 - 0.76), 0.956  | -0.15, (-0.53 - 0.23), 0.444 | 0.25, (-0.28 - 0.77), 0.352  |
| AC C16-OH/C14-DC     | 0.01, (-0.07 - 0.09), 0.869  | 0.08, (-0.69 - 0.84), 0.845  | 0.07, (-0.31 - 0.44), 0.724  | 0.23, (-0.28 - 0.74), 0.381  |
| AC C18:2             | 0.03, (-0.05 - 0.11), 0.487  | 0.05, (-0.72 - 0.82), 0.894  | -0.22, (-0.6 - 0.15), 0.245  | 0.21, (-0.3 - 0.73), 0.418   |
| AC C18:1             | -0.01, (-0.09 - 0.07), 0.773 | -0.12, (-0.91 - 0.66), 0.759 | -0.11, (-0.49 - 0.28), 0.584 | 0.16, (-0.37 - 0.68), 0.558  |
| AC C18               | 0.09, (0 - 0.17), 0.038      | 0.79, (0 - 1.57), 0.05       | 0.22, (-0.16 - 0.61), 0.252  | 0.63, (0.1 - 1.15), 0.02     |
| AC C18:1-OH/C16:1-DC | -0.02, (-0.1 - 0.07), 0.687  | -0.11, (-0.91 - 0.68), 0.781 | -0.09, (-0.47 - 0.29), 0.649 | 0.05, (-0.48 - 0.58), 0.86   |
| AC C18-OH/C16-DC     | 0.02, (-0.06 - 0.1), 0.675   | 0.2, (-0.58 - 0.98), 0.615   | 0.08, (-0.3 - 0.46), 0.681   | 0.27, (-0.26 - 0.79), 0.319  |
| AC C20               | -0.02, (-0.1 - 0.07), 0.701  | -0.13, (-0.92 - 0.66), 0.748 | 0.06, (-0.32 - 0.45), 0.744  | -0.21, (-0.74 - 0.31), 0.425 |
| AC C18:1-DC          | 0.01, (-0.07 - 0.09), 0.867  | 0.23, (-0.54 - 0.99), 0.561  | -0.08, (-0.45 - 0.3), 0.687  | 0.34, (-0.18 - 0.85), 0.202  |
| AC C20-OH/C18-DC     | 0.06, (-0.02 - 0.14), 0.134  | 0.7, (-0.05 - 1.46), 0.068   | 0.4, (0.04 - 0.77), 0.031    | 0.52, (0.01 - 1.02), 0.046   |
| AC C22               | 0.02, (-0.06 - 0.11), 0.565  | 0.16, (-0.65 - 0.96), 0.7    | -0.19, (-0.6 - 0.21), 0.354  | 0.13, (-0.4 - 0.67), 0.624   |
| AC C8:1-OH/C6:1-DC   | -0.03, (-0.1 - 0.05), 0.528  | -0.16, (-0.94 - 0.61), 0.68  | -0.09, (-0.47 - 0.29), 0.632 | -0.16, (-0.68 - 0.36), 0.558 |
| AC C7-DC             | 0.03, (-0.18 - 0.25), 0.751  | 0.73, (-1.19 - 2.65), 0.456  | 0.32, (-0.63 - 1.26), 0.512  | 0.4, (-0.85 - 1.66), 0.53    |
| AC C8:1-DC           | -0.02, (-0.1 - 0.07), 0.711  | -0.01, (-0.8 - 0.78), 0.977  | -0.08, (-0.46 - 0.31), 0.702 | 0.02, (-0.51 - 0.56), 0.936  |
| AC C16:2             | -0.04, (-0.15 - 0.07), 0.509 | -0.08, (-1.11 - 0.94), 0.872 | 0.04, (-0.48 - 0.55), 0.889  | 0.12, (-0.55 - 0.79), 0.726  |

|                      |                              |                              |                               |                              |
|----------------------|------------------------------|------------------------------|-------------------------------|------------------------------|
| AC C16:1             | -0.04, (-0.11 - 0.04), 0.38  | -0.33, (-1.1 - 0.43), 0.394  | -0.28, (-0.65 - 0.1), 0.146   | 0.13, (-0.38 - 0.64), 0.619  |
| AC C16:1-OH/C14:1-DC | -0.01, (-0.09 - 0.06), 0.738 | -0.07, (-0.83 - 0.69), 0.859 | -0.17, (-0.54 - 0.2), 0.373   | 0.18, (-0.33 - 0.7), 0.481   |
| AC C18:2-OH          | 0.05, (-0.04 - 0.15), 0.282  | 0.75, (-0.17 - 1.66), 0.11   | 0.13, (-0.32 - 0.57), 0.57    | 0.51, (-0.09 - 1.11), 0.098  |
| AC C20:4             | -0.02, (-0.1 - 0.06), 0.646  | -0.18, (-0.98 - 0.62), 0.658 | 0, (-0.4 - 0.4), 0.996        | -0.15, (-0.69 - 0.39), 0.593 |
| 3-Hydroxybutyrate    | 0.02, (-0.06 - 0.1), 0.666   | 0.38, (-0.4 - 1.16), 0.338   | 0.19, (-0.19 - 0.57), 0.325   | 0.26, (-0.26 - 0.78), 0.322  |
| Methionine           | -0.06, (-0.13 - 0.02), 0.15  | -0.58, (-1.32 - 0.17), 0.131 | -0.37, (-0.74 - -0.01), 0.045 | -0.19, (-0.69 - 0.32), 0.469 |
| NEFA                 | -0.01, (-0.08 - 0.07), 0.875 | 0.12, (-0.63 - 0.88), 0.749  | -0.07, (-0.43 - 0.3), 0.721   | 0.29, (-0.21 - 0.8), 0.259   |
| Ornithine            | -0.07, (-0.15 - 0.01), 0.077 | -0.61, (-1.39 - 0.17), 0.124 | -0.46, (-0.84 - -0.08), 0.018 | -0.31, (-0.83 - 0.22), 0.251 |
| Phenylalanine        | -0.06, (-0.14 - 0.02), 0.113 | -0.51, (-1.29 - 0.26), 0.194 | -0.41, (-0.79 - -0.04), 0.032 | -0.18, (-0.7 - 0.34), 0.502  |
| Proline              | -0.05, (-0.12 - 0.03), 0.213 | -0.58, (-1.32 - 0.17), 0.128 | -0.52, (-0.88 - -0.16), 0.005 | -0.08, (-0.58 - 0.42), 0.756 |
| Serine               | 0.03, (-0.05 - 0.11), 0.486  | 0.08, (-0.69 - 0.84), 0.839  | -0.15, (-0.52 - 0.23), 0.444  | 0.22, (-0.29 - 0.73), 0.403  |
| Triglycerides        | 0, (-0.08 - 0.08), 0.927     | -0.07, (-0.84 - 0.7), 0.859  | -0.04, (-0.41 - 0.34), 0.843  | 0.03, (-0.48 - 0.55), 0.894  |
| Tyrosine             | -0.08, (-0.16 - 0), 0.058    | -0.73, (-1.51 - 0.04), 0.063 | -0.44, (-0.82 - -0.06), 0.022 | -0.21, (-0.73 - 0.31), 0.429 |
| Valine               | 0, (-0.08 - 0.08), 0.952     | -0.18, (-0.95 - 0.6), 0.656  | -0.08, (-0.46 - 0.3), 0.669   | -0.09, (-0.61 - 0.43), 0.742 |
